# Supplementary material for: Controlled synthesis of magnetic Pd/Fe3O4 spheres via an ethylenediamine-assisted route
Source: Royal Society of Chemistry journal article supplement (doi:10.1039/c2dt12278b), 2012-01-01
Supplement: c2dt12278b.pdf [file c2dt12278b.pdf]

## ***Supporting Information for***

### **Controlled Synthesis of Magnetic Pd/Fe<sub>3</sub>O<sub>4</sub> Spheres via an Ethylenediamine-Assisted Route**

Hai-Qun Wang, Xiao Wei, Kai-Xue Wang,\* and Jie-Sheng Chen\*

School of Chemistry and Chemical Engineering, Shanghai Jiao Tong University,  
Shanghai 200240, People's Republic of China

#### **The Fourier transform infrared spectroscopy**

The Fourier transform infrared (FTIR) spectrum provides direct proof for the existence of related substances. The peaks located at 1636 cm<sup>-1</sup> and 1396 cm<sup>-1</sup> are attributed to N-H bending vibration and C-N stretching vibration, respectively, indicating the existence of en in the obtained magnetic nanoparticles. The absorption bands located at about 2968-2860 cm<sup>-1</sup> are assigned to the C-H stretching band, whereas the band at 1082 cm<sup>-1</sup> corresponds to C-O stretching vibration, implying the presence of few residual EG molecules in the nanoparticles. The strong band appearing at 586 cm<sup>-1</sup> is characteristics of Fe-O vibrations, revealing the existence of Fe<sub>3</sub>O<sub>4</sub>.

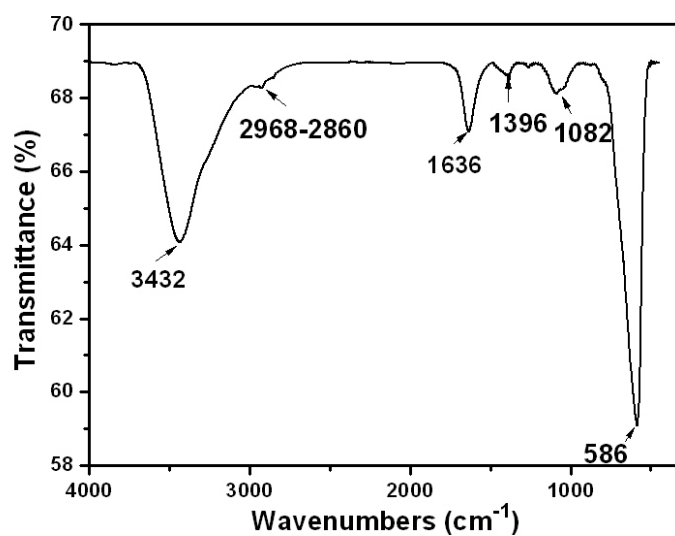

**Fig.S1** FTIR spectrum for the Pd/Fe<sub>3</sub>O<sub>4</sub> hollow (or solid) spheres.

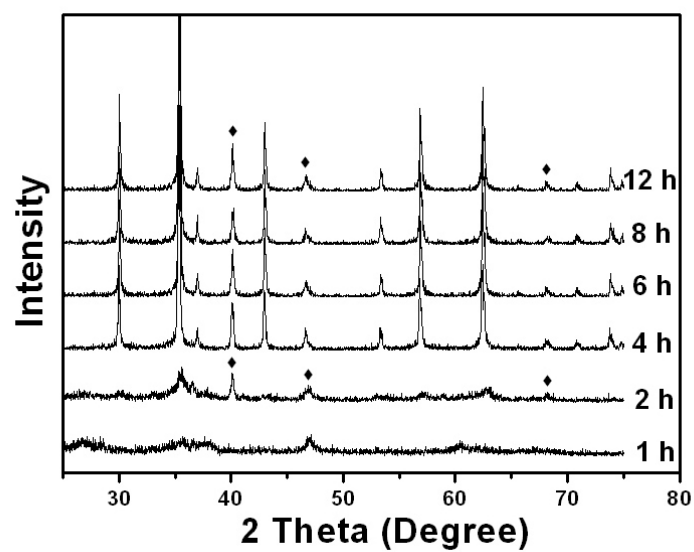

**Fig.S2** XRD patterns of the as-synthesized products in different reaction times.

◆: peaks of Pd

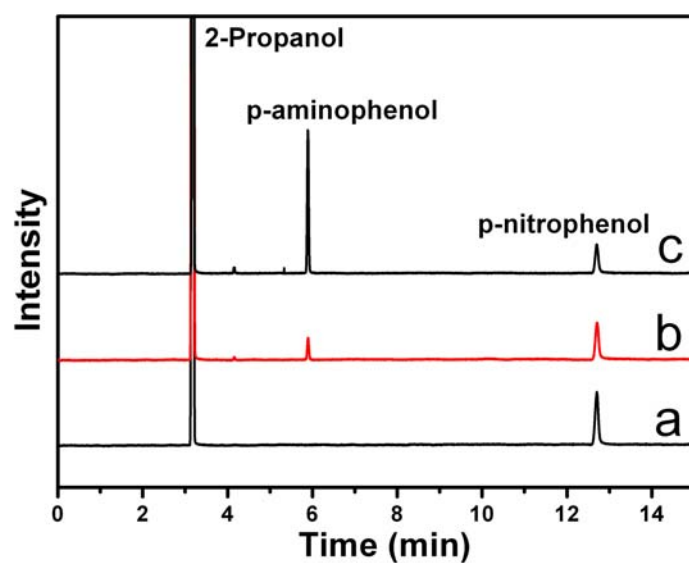

**Fig.S3 GC traces for the reaction product obtained at different reaction times:**

**(a) 0 min, (b) 290 min and (c) 470 min (catalyst: hollow Pd/Fe<sub>3</sub>O<sub>4</sub> spheres).**

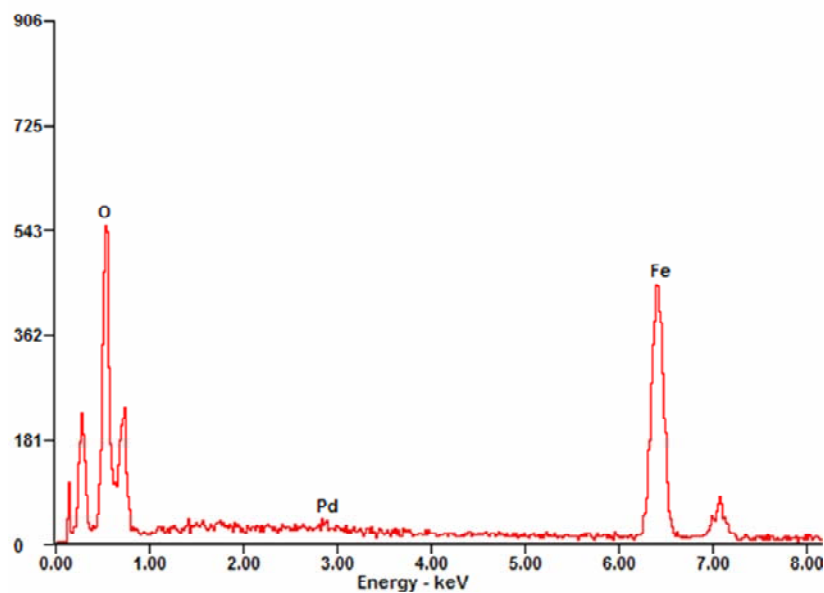

**Fig.S4 The EDX spectrum of Pd/Fe<sub>3</sub>O<sub>4</sub> solid spheres.**
